# Supplementary material for: Machine-Learning Functional Zonation Approach for Characterizing Terrestrial–Aquatic Interfaces: Application to Lake Erie
Source: MDPI journal article supplement (doi:10.3390/rs14143285), 2022-07-08
Supplement: s1 [file s1]

## Supplemental materials

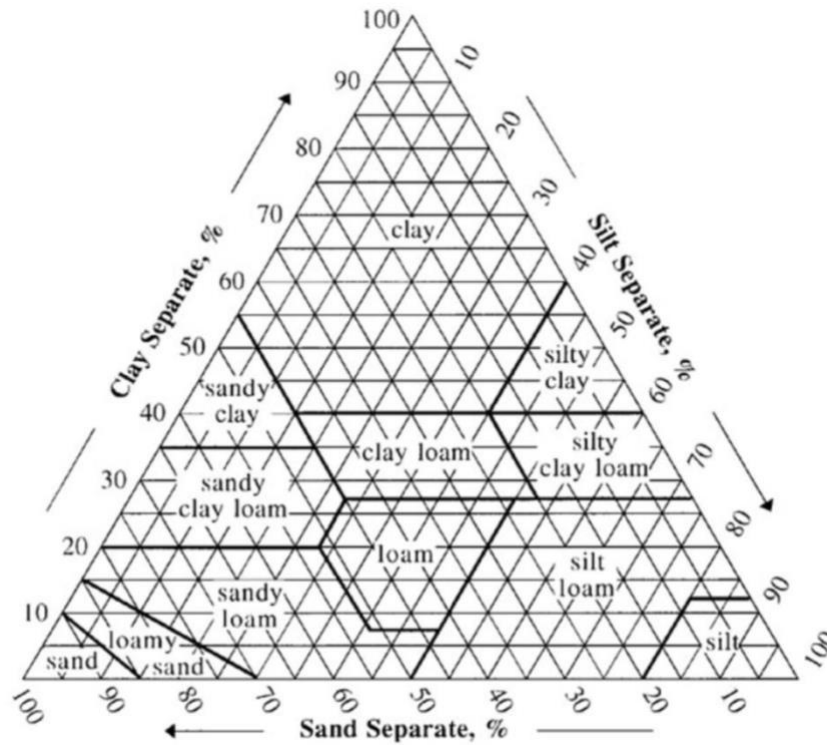

**Figure S1.** Soil texture triangle (USDA soil texture triangle)

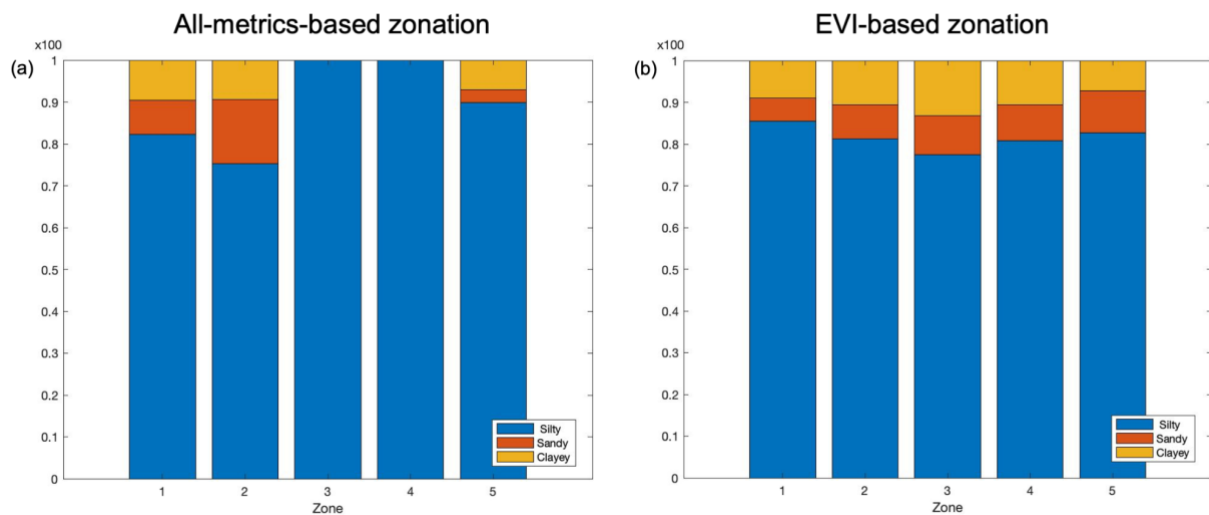

**Figure S2.** Percentage of soil texture in each cluster for (a) the all-metrics-based zonation, and (b) the EVI-based zonation.
